# Supplementary material for: Valorization of Wild Apple (Malus spp.) By-Products as a Source of Essential Fatty Acids, Tocopherols and Phytosterols with Antimicrobial Activity
Source: Plants (Basel). 2018 Oct 24;7(4):90. doi: 10.3390/plants7040090 (PMC6313870; doi:10.3390/plants7040090)
Supplement: Supplementary file 1 [file plants-07-00090-s001.pdf]

## Supplementary Materials

**Table 1S.** The list of fruit used in this study.

| Latin name                | Image                                                                              | Source                                                                                           | Origin                                                                   | Main features                                                                                                                                                                                                          | Use                                                            |
|---------------------------|------------------------------------------------------------------------------------|--------------------------------------------------------------------------------------------------|--------------------------------------------------------------------------|------------------------------------------------------------------------------------------------------------------------------------------------------------------------------------------------------------------------|----------------------------------------------------------------|
| <i>M. × souldardii</i>    | 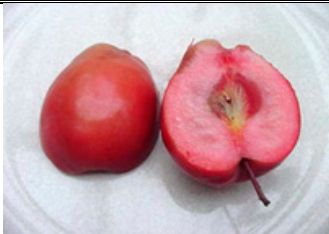  | Received in 2010 within the framework of mutual cooperation from the Gottingen Botanical Garden. | A hybrid of garden origin, probably <i>M. ioensis</i> × <i>M. pumila</i> | The fruits are medium to small, mostly oval in shape, with a dark pink/red skin and flesh color. Crunchy, juicy. Scab-resistant. Excellent winter hardiness. High productivity. Dark red skin and flesh color.         | For wine and cider, sauce, souffle and marshmallow production. |
| <i>M. Bernu prieks</i>    | 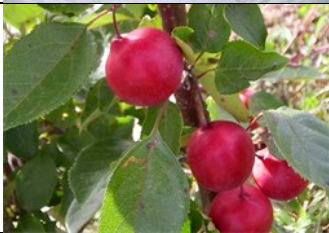  | Found in 2002 at Kandava, Ozolaji, in the garden of the Latvian breeder Rudolf Aker.             | Most likely this is Budagovsky's open-pollinated seedling                | The fruits are small in size, 20-30 g, mostly pear-shaped. Red flowers, dark red skin and red-pink flesh. Ripen early. A distinctive lingonberry aroma. Excellent winter hardiness. High productivity.                 | For juice, jam, wine and cider production.                     |
| <i>M. sp.</i> , cv. 'Ola' | 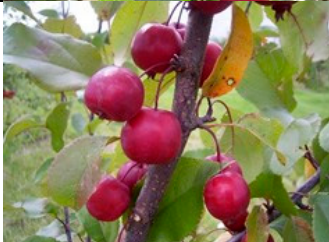 | The cultivar was bred by the Polish breeder Jan Grąbczewski before 1990.                         | Cultivar was probably derived from the pink apple <i>M. × purpurea</i>   | The fruits are small in size 15-25 g, mostly round-shaped. Dark red skin and flesh color. A distinctive sourness and almond aroma, without astringency. Scab-resistant. Excellent winter hardiness. High productivity. | For jam, stewed fruit production                               |

Continuation of Table 1

| Latin name                                    | Image                                                                             | Source                                                                                                                                   | Origin                                 | Main features                                                                                                                                                                                                    | Use                                   |
|-----------------------------------------------|-----------------------------------------------------------------------------------|------------------------------------------------------------------------------------------------------------------------------------------|----------------------------------------|------------------------------------------------------------------------------------------------------------------------------------------------------------------------------------------------------------------|---------------------------------------|
| <i>M.</i><br>Berzukroga<br>dzeltenais         | 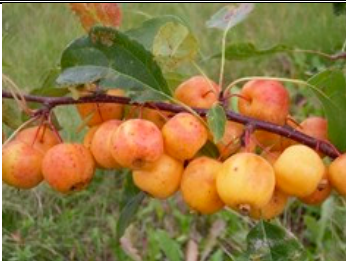 | Found in 2002 along the roadside in Cesis, Latvia. The mother tree has been removed.                                                     | Accidental seedling of unknown origin. | Fruits small in size - 15-20 g, round-shaped with a yellow skin and flesh, crisp, juice, with a very distinctive apple-pineapple flavor that is perfectly preserved in wines and ciders even in large dilutions. | For juice, wine and cider production. |
| <i>M. × domestica</i><br>Borkh. cv.<br>'Gita' | 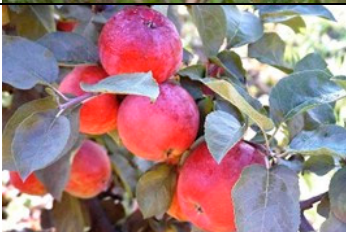 | Latvian high-quality cultivar of domesticated apple which was developed at the Institute of Horticulture in 2009. Breeder – Laila Ikase. | Cross of Liberty' × 'Melba'.           | Fruits are large, with red blush and stripes, sub-acid, juicy and crisp. Scab-resistant with rather good tolerance to mildew and other diseases. The tree is very productive with regular yield.s                | For fresh consumption and processing. |

**Table 2S.** Calibration data for the standards.

| Standard                                       | Linearity range, mg<br>mL <sup>-1</sup> | a (mean ± SD)                             | b (mean ± SD)                             | r <sup>2</sup> |
|------------------------------------------------|-----------------------------------------|-------------------------------------------|-------------------------------------------|----------------|
| Methyl heptadecanoic acid for<br>methyl esters | 0.133 – 1.133                           | $5.65 \times 10^6 \pm 9.252 \times 10^6$  | $2.70 \times 10^6 \pm 0.232 \times 10^6$  | 0.9990         |
| γ-Linoleic acid for silyl derivatives          | 0.100 – 0.900                           | $9.14 \times 10^5 \pm 16.252 \times 10^5$ | $7.545 \times 10^8 \pm 0.052 \times 10^8$ | 0.9995         |
| Dodecanal for silyl derivatives                | 0.040 – 0.500                           | $-1.82 \times 10^7 \pm 22.34 \times 10^7$ | $6.386 \times 10^8 \pm 0.971 \times 10^8$ | 0.9995         |
| Ergosterol for silyl derivatives               | 0.100 – 0.900                           | $6.26 \times 10^5 \pm 7.16 \times 10^5$   | $3.581 \times 10^8 \pm 0.024 \times 10^8$ | 0.9994         |
| Octadecanol for silyl derivatives              | 0.008 – 0.160                           | $-3.42 \times 10^6 \pm 0.23 \times 10^6$  | $8.555 \times 10^8 \pm 0.042 \times 10^8$ | 0.9998         |
| n-Tetracosane for silyl derivatives            | 0.008 – 0.160                           | $-2.71 \times 10^6 \pm 0.31 \times 10^6$  | $7.722 \times 10^8 \pm 0.050 \times 10^8$ | 0.9996         |
